# Supplementary material for: Multi-omic single-cell snapshots reveal multiple independent trajectories to drug tolerance in a melanoma cell line
Source: PubMed Central journal article supplement (PMC7214418; doi:10.1038/s41467-020-15956-9), 2020-05-11
Supplement: 41467_2020_15956_MOESM2_ESM.pdf [file 41467_2020_15956_MOESM2_ESM.pdf]

## Reporting Summary

Nature Research wishes to improve the reproducibility of the work that we publish. This form provides structure for consistency and transparency in reporting. For further information on Nature Research policies, see [Authors & Referees](#) and the [Editorial Policy Checklist](#).

### Statistics

For all statistical analyses, confirm that the following items are present in the figure legend, table legend, main text, or Methods section.

n/a Confirmed

- The exact sample size ( $n$ ) for each experimental group/condition, given as a discrete number and unit of measurement
- A statement on whether measurements were taken from distinct samples or whether the same sample was measured repeatedly
- The statistical test(s) used AND whether they are one- or two-sided  
*Only common tests should be described solely by name; describe more complex techniques in the Methods section.*
- A description of all covariates tested
- A description of any assumptions or corrections, such as tests of normality and adjustment for multiple comparisons
- A full description of the statistical parameters including central tendency (e.g. means) or other basic estimates (e.g. regression coefficient) AND variation (e.g. standard deviation) or associated estimates of uncertainty (e.g. confidence intervals)
- For null hypothesis testing, the test statistic (e.g.  $F$ ,  $t$ ,  $r$ ) with confidence intervals, effect sizes, degrees of freedom and  $P$  value noted  
*Give  $P$  values as exact values whenever suitable.*
- For Bayesian analysis, information on the choice of priors and Markov chain Monte Carlo settings
- For hierarchical and complex designs, identification of the appropriate level for tests and full reporting of outcomes
- Estimates of effect sizes (e.g. Cohen's  $d$ , Pearson's  $r$ ), indicating how they were calculated

*Our web collection on [statistics for biologists](#) contains articles on many of the points above.*

### Software and code

Policy information about [availability of computer code](#)

|                 |                                                                                                                                                                                                                                                                                                                                                                                                                                                                                                                                                                                                                                                                                                                                                                                                                                                                                                                                                                               |
|-----------------|-------------------------------------------------------------------------------------------------------------------------------------------------------------------------------------------------------------------------------------------------------------------------------------------------------------------------------------------------------------------------------------------------------------------------------------------------------------------------------------------------------------------------------------------------------------------------------------------------------------------------------------------------------------------------------------------------------------------------------------------------------------------------------------------------------------------------------------------------------------------------------------------------------------------------------------------------------------------------------|
| Data collection | No software was used to collect data.                                                                                                                                                                                                                                                                                                                                                                                                                                                                                                                                                                                                                                                                                                                                                                                                                                                                                                                                         |
| Data analysis   | GraphPad Prism v6 for statistical analyses. Automated acquisition software (METAMORPH, Molecular Devices) was used to acquire differential interference contrast (DIC) and GFP images which were further analyzed using open-source software ilastik (version 1.3.2) and a custom Python (3.7) code which is available upon request.<br>Custom code for analysis of raw CSV output of SCBC measurements was written in R and has been made available/open-source via GitHub ( <a href="https://github.com/mesako/Melanoma-Publication">https://github.com/mesako/Melanoma-Publication</a> ). FLOWMAPR R package (version 1.2.0) are available on GitHub ( <a href="https://github.com/zunderlab/FLOWMAP/">https://github.com/zunderlab/FLOWMAP/</a> ). Clustering analysis was produced using the Rclusterpp R package (version 0.2.5) using all default settings. Hmisc R package (version 4.2-0) and igraph R package (version 1.2.4.1) were used for the network analysis. |

For manuscripts utilizing custom algorithms or software that are central to the research but not yet described in published literature, software must be made available to editors/reviewers. We strongly encourage code deposition in a community repository (e.g. GitHub). See the Nature Research [guidelines for submitting code & software](#) for further information.

### Data

Policy information about [availability of data](#)

All manuscripts must include a [data availability statement](#). This statement should provide the following information, where applicable:

- Accession codes, unique identifiers, or web links for publicly available datasets
- A list of figures that have associated raw data
- A description of any restrictions on data availability

All the data supporting the findings of this study are available within the article and its supplementary information files and from the corresponding author upon reasonable request. Raw data for underlying Figs. 3c-f, h-i, 5a-e, and Supplementary Figs. 3, 4, 5, 6 and 21A-C are provided in the Source Data file.

## Field-specific reporting

Please select the one below that is the best fit for your research. If you are not sure, read the appropriate sections before making your selection.

- Life sciences     Behavioural & social sciences     Ecological, evolutionary & environmental sciences

For a reference copy of the document with all sections, see [nature.com/documents/nr-reporting-summary-flat.pdf](https://www.nature.com/documents/nr-reporting-summary-flat.pdf)

## Life sciences study design

All studies must disclose on these points even when the disclosure is negative.

|                 |                                                                                                                                                                                                                            |
|-----------------|----------------------------------------------------------------------------------------------------------------------------------------------------------------------------------------------------------------------------|
| Sample size     | Because this study is not a clinical trial of drugs or a comparative study of groups, there is no sample-size calculation in this study. For in vitro experiments, N=3 was used as the minimum samples for quantification. |
| Data exclusions | No data exclusions.                                                                                                                                                                                                        |
| Replication     | All experiments was repeated at least 3 times and all attempts at replication were successful.                                                                                                                             |
| Randomization   | Randomization is not relevant to this study since most of the experiments are in vitro cell culture related rather than mouse experiments or clinical trials which requires comparative study of groups.                   |
| Blinding        | Blinding was not relevant to this study because this study did not involve clinical sample grouping etc.                                                                                                                   |

## Reporting for specific materials, systems and methods

We require information from authors about some types of materials, experimental systems and methods used in many studies. Here, indicate whether each material, system or method listed is relevant to your study. If you are not sure if a list item applies to your research, read the appropriate section before selecting a response.

### Materials & experimental systems

| n/a                                 | Involvement in the study                                        |
|-------------------------------------|-----------------------------------------------------------------|
| <input type="checkbox"/>            | <input checked="" type="checkbox"/> Antibodies                  |
| <input type="checkbox"/>            | <input checked="" type="checkbox"/> Eukaryotic cell lines       |
| <input checked="" type="checkbox"/> | <input type="checkbox"/> Palaeontology                          |
| <input checked="" type="checkbox"/> | <input type="checkbox"/> Animals and other organisms            |
| <input type="checkbox"/>            | <input checked="" type="checkbox"/> Human research participants |
| <input checked="" type="checkbox"/> | <input type="checkbox"/> Clinical data                          |

### Methods

| n/a                                 | Involvement in the study                           |
|-------------------------------------|----------------------------------------------------|
| <input checked="" type="checkbox"/> | <input type="checkbox"/> ChIP-seq                  |
| <input type="checkbox"/>            | <input checked="" type="checkbox"/> Flow cytometry |
| <input checked="" type="checkbox"/> | <input type="checkbox"/> MRI-based neuroimaging    |

## Antibodies

### Antibodies used

Alexa Fluor® 488 Mouse anti-Ki-67 - BD - 561165  
 Human Human/Mouse Total HIF-1 alpha DuoSet IC ELISA - R&D systems - dyc1935-2  
 Human Axl APC-conjugated Antibody - R&D systems - FAB154A  
 NGF R/TNFRSF16 DuoSet ELISA - R&D systems - DY367  
 Anti-Melan-A antibody, Mouse monoclonal - Sigma Aldrich - M6570  
 Human Melan-A/MART-1 Antibody - R&D systems - AF8008  
 Human MITF Antibody - R&D systems - AF5769  
 Anti-MiTF antibody – abcam - ab80651  
 Human/Mouse/Rat Phospho-ERK1 (T202/Y204) DuoSet IC ELISA - R&D systems - DYC1825  
 Human Phospho-Src (Y419) DuoSet IC ELISA - R&D systems - DYC2685  
 Human/Mouse RelA/NFkB p65 Antibody - R&D systems - MAB5078  
 Phospho-NF-kB p65 (Ser536) (93H1) Rabbit mAb (Biotinylated) - Cell Signaling – 4025  
 Human Total Axl DuoSet IC ELISA - R&D - DYC16432  
 ANTI-SNAI2 antibody produced in mouse - Sigma-Aldrich - SAB1412527  
 Human/Mouse/Rat Total AMPK alpha 1 DuoSet IC ELISA - R&D systems - DYC3197-2  
 Human/Mouse/Rat Muscle Phosphofructokinase/PFKM Antibody - R&D systems - AF7687  
 PFKP (D2E5) Rabbit mAb - Cell Signaling – 12746  
 Human/Mouse/Rat Acetyl-CoA Carboxylase Antibody - R&D Systems - AF6898  
 Phospho-Acetyl-CoA Carboxylase (Ser79) Antibody -Cell Signaling- 11818  
 Phospho-LKB1 (Ser428) Antibody - Cell Signaling - 3482  
 Human LKB1 Antibody, - R&D Systems - AF8055  
 Anti-PDK1 Antibody - Abcam - ab110335  
 PDHK1 Antibody - Cell Signaling - 3820  
 Human/Mouse/Rat PKM2 Antibody - R&D Systems - AF7244

PKM2 Antibody -Cell Signaling- 4053  
 Lactate Dehydrogenase B Antibody -Novus Biologicals- NBP1-55415  
 M01 Lactate Dehydrogenase B Antibody - Novus Biologicals - H00003945  
 PE anti-human CD271 (NGFR) Antibody - Biolegend - 345106  
 PE anti-ERK1/2 Phospho (Thr202/Tyr204) Antibody - Biolegend - 369505  
 Melan-A/MART-1 Antibody (A103) [Alexa Fluor® 647] - Novus Biologicals - NBP2-46603AF647  
 Multiple lots of the same antibodies were tested and used, results were consistent.

## Validation

All antibodies used in this study are commercially available and validated by manufacturers. All validation are provided on the product details page of each commercially available antibody.

## Eukaryotic cell lines

### Policy information about [cell lines](#)

## Cell line source(s)

Human melanoma cell line M397 were established from patient's biopsies under University of California, Los Angeles, institutional review board approval #11-003254. HEK-293T Cells purchased from ATCC, Manassas, VA Cat # CRL-3216.

## Authentication

Cell lines were periodically authenticated to their early passages using GenePrint® 10 System (Promega, Madison, WI).

## Mycoplasma contamination

Cell lines used in this study tested negative for mycoplasma contamination

Commonly misidentified lines  
(See [ICLAC](#) register)

No commonly misidentified lines were used in the study.

## Human research participants

### Policy information about [studies involving human research participants](#)

## Population characteristics

Because this study only used one cell line that are previous derived from a melanoma patients (this cell line has also been used by many previous publications) and because this study is not directly related to any clinical trials, the population characteristics are not applicable here.

## Recruitment

Because this study only used one cell line that are previous derived from a melanoma patients (this cell line has also been used by many previous publications) and are not directly related to any clinical trials, the recruitment information is not applicable here.

## Ethics oversight

Patient-derived melanoma cell line, M397, used in this study was previously generated under UCLA IRB approval # 11-003254.

Note that full information on the approval of the study protocol must also be provided in the manuscript.

## Flow Cytometry

### Plots

Confirm that:

- The axis labels state the marker and fluorochrome used (e.g. CD4-FITC).
- The axis scales are clearly visible. Include numbers along axes only for bottom left plot of group (a 'group' is an analysis of identical markers).
- All plots are contour plots with outliers or pseudocolor plots.
- A numerical value for number of cells or percentage (with statistics) is provided.

### Methodology

## Sample preparation

Cells were washed and trypsinized from culture plates, following by centrifugation at 500g and 4°C for 5 min to pellet cells. Cell pellets were then resuspended in PBS containing 1%BSA before FACS sorting. The gating strategy is shown in Supplementary Fig 29.

## Instrument

FACS: FACS Special Order Research Product, Becton-Dickinson.

## Software

Flow cytometry plots were analyzed on FlowJo (Treestar).

## Cell population abundance

The top 10% GFP-high and the bottom 10% GFP-low subpopulations were sorted.

## Gating strategy

The gating strategy is shown in Supplementary Fig 29.

- Tick this box to confirm that a figure exemplifying the gating strategy is provided in the Supplementary Information.
