# Supplementary material for: Multi-omic single-cell snapshots reveal multiple independent trajectories to drug tolerance in a melanoma cell line
Source: Nat Commun. 2020 May 11;11:2345. doi: 10.1038/s41467-020-15956-9 (PMC7214418; doi:10.1038/s41467-020-15956-9)
Supplement: Supplementary file 3 — Source Data [file 41467_2020_15956_MOESM3_ESM.xlsx]

## Sheet: Figure 3c
Figure 3c
		Module2-low	Module2-high
	cell1	1.38799	0.017518
	cell2	1.83353	0.024826
	cell3	0.841169	0.036015
	cell4	0.751884	0.023045
	cell5	2.39321	0.034371
	cell6	0.52693	0.024505
	cell7	0.515324	0.021491
	cell8	0.907652	0.019366
	cell9	1.22585	0.014936
	cell10	1.27395	0.032225
	cell11	0.829166	0.030123
	cell12	0.674614	0.018316
	cell13	0.681316	0.014342
	cell14	0.657897	0.055313
	cell15	0.780041	0.020417
	cell16	0.719476	0.016443

## Sheet: Figure 3d
Figure 3d
		Module2-low	Module2-high
	cell1	1.35906	0.500793
	cell2	1.36126	0.651514
	cell3	1.12625	0.421308
	cell4	1.07457	0.483854
	cell5	0.750974	0.398297
	cell6	0.887362	0.496884
	cell7	0.865641	0.466484
	cell8	1.02463	0.671954
	cell9	0.814393	0.675863
	cell10	0.685823	0.478211
	cell11	1.11236	0.475605
	cell12	0.991196	0.614178
	cell13	1.23049	0.686287
	cell14	0.926904	0.616354
	cell15	0.857844	0.757081
	cell16	0.931257	0.688893

## Sheet: Figure 3e
Figure 3e
		MITF-high	MITF-low
	replicate1	0.802283	0.594082
	replicate2	1.10891	0.443068
	replicate3	1.0888	0.456595

## Sheet: Figure 3f
Figure 3f
		MITF-high	MITF-low
	replicate1	2.04825	8.42356
	replicate2	1.80731	4.9663
	replicate3	2.14203	14.0105

## Sheet: Figure 3h
Figure 3h
			Module2-Low																Module2-High
		Slug	0.77304	1.01444	1.12112	0.938242	0.727782	0.816818	0.67111	0.922789	0.678871	2.76917	0.933463	0.659343	0.969185	0.984604	0.892984	1.12704	1.08252	0.362429	0.330792	0.526903	0.284055	0.506305	0.373467	0.650136	0.959955	0.535734	1.44384	0.470606	0.401803	0.781131	0.601965	0.929446
		MITF	1.13861	0.983851	1.07169	0.969613	0.992202	1.09134	1.00016	1.07838	0.85502	1.01228	0.995967	0.814428	0.894751	1.02316	1.15869	0.91985	0.564289	0.56262	0.74584	0.785998	0.477699	0.597758	0.623685	0.592305	0.551306	0.590229	0.682667	0.645019	0.590643	0.651286	0.718232	0.750019
		Mart1	1.88951	0.73424	0.961973	1.33482	1.15894	1.16743	0.857781	1.10109	0.397824	0.682649	0.971397	0.880453	0.940601	0.899581	0.983153	1.03857	0.039191	0.035428	0.046407	0.046749	0.040684	0.038414	0.045785	0.04209	0.04803	0.050139	0.070137	0.060185	0.053653	0.06131	0.071008	0.092157
		PFK	1.39609	0.803273	0.958554	0.81096	0.933432	1.0716	0.795259	1.4903	0.668241	0.554492	0.95645	1.04541	1.16858	1.29874	0.844436	1.20416	0.481895	0.687082	0.469334	0.502841	0.48714	0.473542	0.509122	0.545072	0.607877	0.564611	0.549946	0.504945	0.652539	0.666507	0.521683	0.634734

## Sheet: Figure 3i
Figure 3i
			MITF-High			MITF-Low
		Slug	0.977014	1.0185	1.00448	0.194313	0.198396	0.227897
		MITF1	0.824399	1.0878	1.0878	0.321171	0.371495	0.379301
		Mart1	0.995384	1.00231	1.00231	0.153183	0.20073	0.175961
		PFK	1.08127	0.791538	1.12719	0.351776	0.359168	0.332801

## Sheet: Figure 5a
Figure 5a
		MITF-high	MITF-low
	replicate1	1.05097	0.956182
	replicate2	1.01628	0.977293
	replicate3	0.978465	0.888858
	replicate4	1.00514	0.911688
	replicate5	0.949141	0.949611

## Sheet: Figure 5b
Figure 5b
		MITF-high	MITF-low
	replicate1	0.605749	0.981132
	replicate2	0.865356	0.716981
	replicate3	0.72113	1.24528
	replicate4	0.490368	1.0566

## Sheet: Figure 5c
Figure 5c
		Control	MITF-sh
	replicate1	1.05847	0.769936
	replicate2	1.04741	0.763548
	replicate3	1.09855	0.591856
	replicate4	0.83299	0.638198
	replicate5	0.962583	0.847889

## Sheet: Figure 5d
Figure 5d
		Control	MITF-sh
	replicate1	0.736823	0.98064
	replicate2	0.652982	0.971464
	replicate3	0.887981	1.00506
	replicate4	0.930345	1.04284

[truncated: 9 more sheets: Figure 5e, Figure S3, Figure S4, Figure S5, Figure S6, Figure S21A, Figure S21B, Figure S21C, SCBC rawdata]
